# Supplementary material for: Genetic diversity, linkage disequilibrium and power of a large grapevine (Vitis vinifera L) diversity panel newly designed for association studies
Source: PubMed Central journal article supplement (PMC4802926; doi:10.1186/s12870-016-0754-z), 2016-03-22

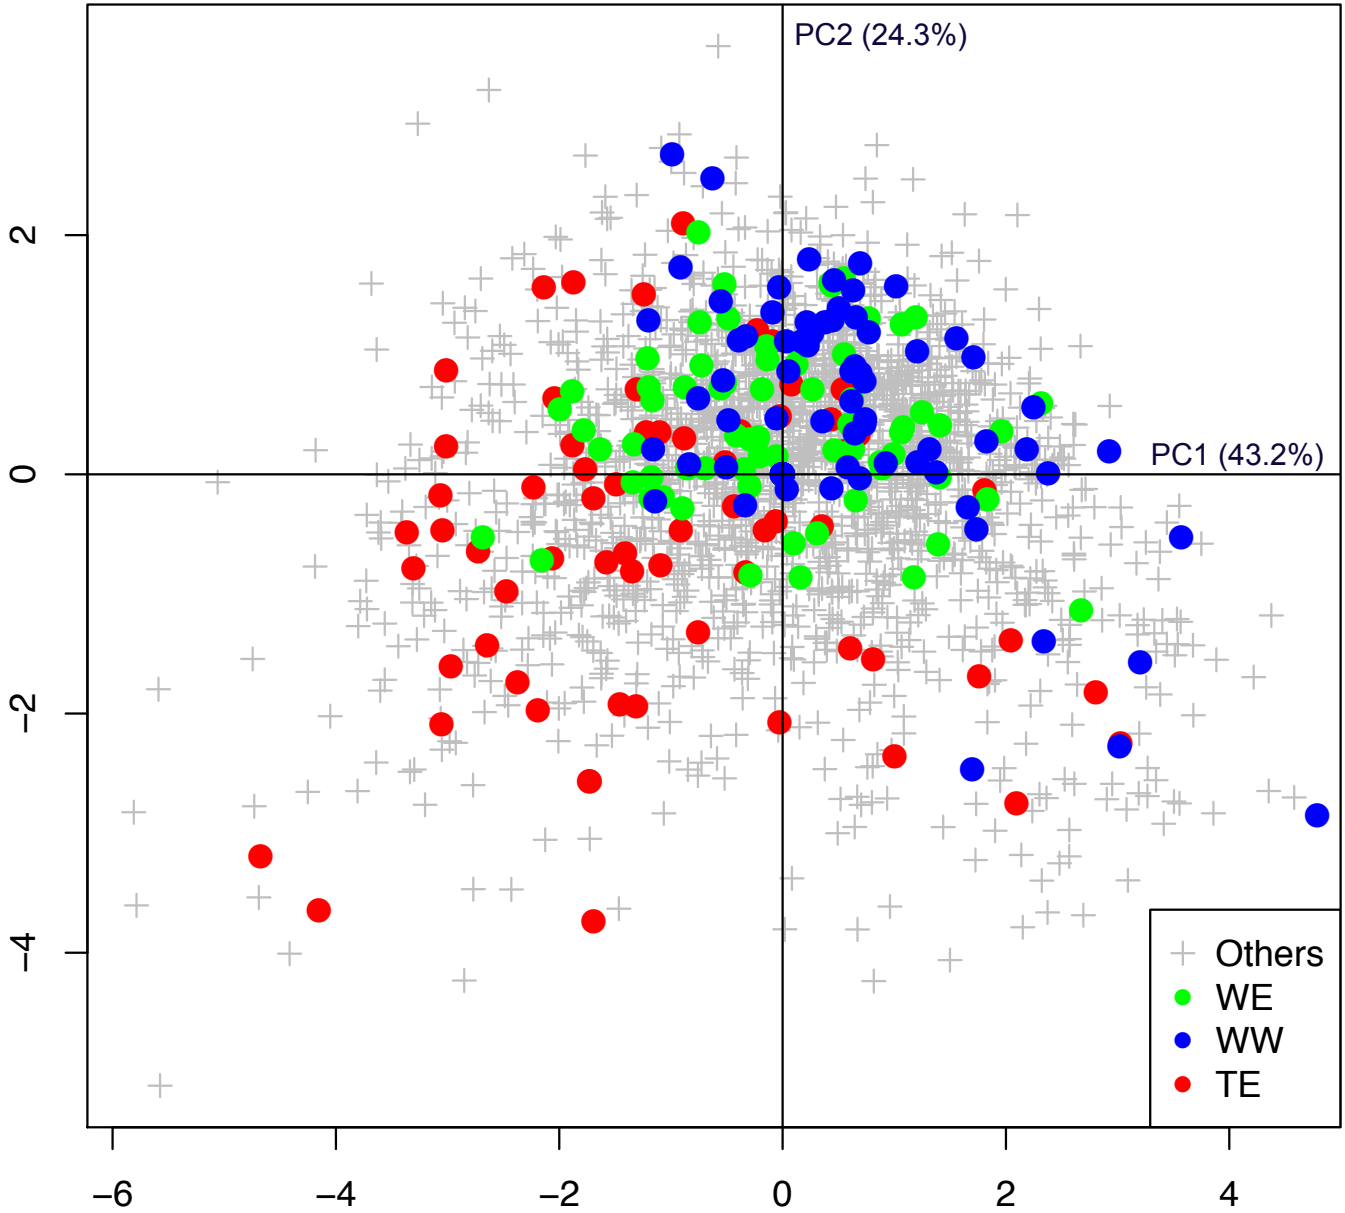

Supplement: 12870_2016_754_MOESM12_ESM.pdf [file 12870_2016_754_MOESM12_ESM.pdf]
