# Supplementary material for: Genetic diversity, linkage disequilibrium and power of a large grapevine (Vitis vinifera L) diversity panel newly designed for association studies
Source: PubMed Central journal article supplement (PMC4802926; doi:10.1186/s12870-016-0754-z), 2016-03-22

WE vs. TE

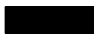

WW vs. TE

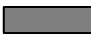

WW vs. WE

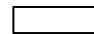

Fst value

0.08

0.06

0.04

0.02

SNPs\_Ch08

SNPs\_Ch09

SNPs\_Ch12

SNPs\_Ch17

SNPs\_distr

SSRn

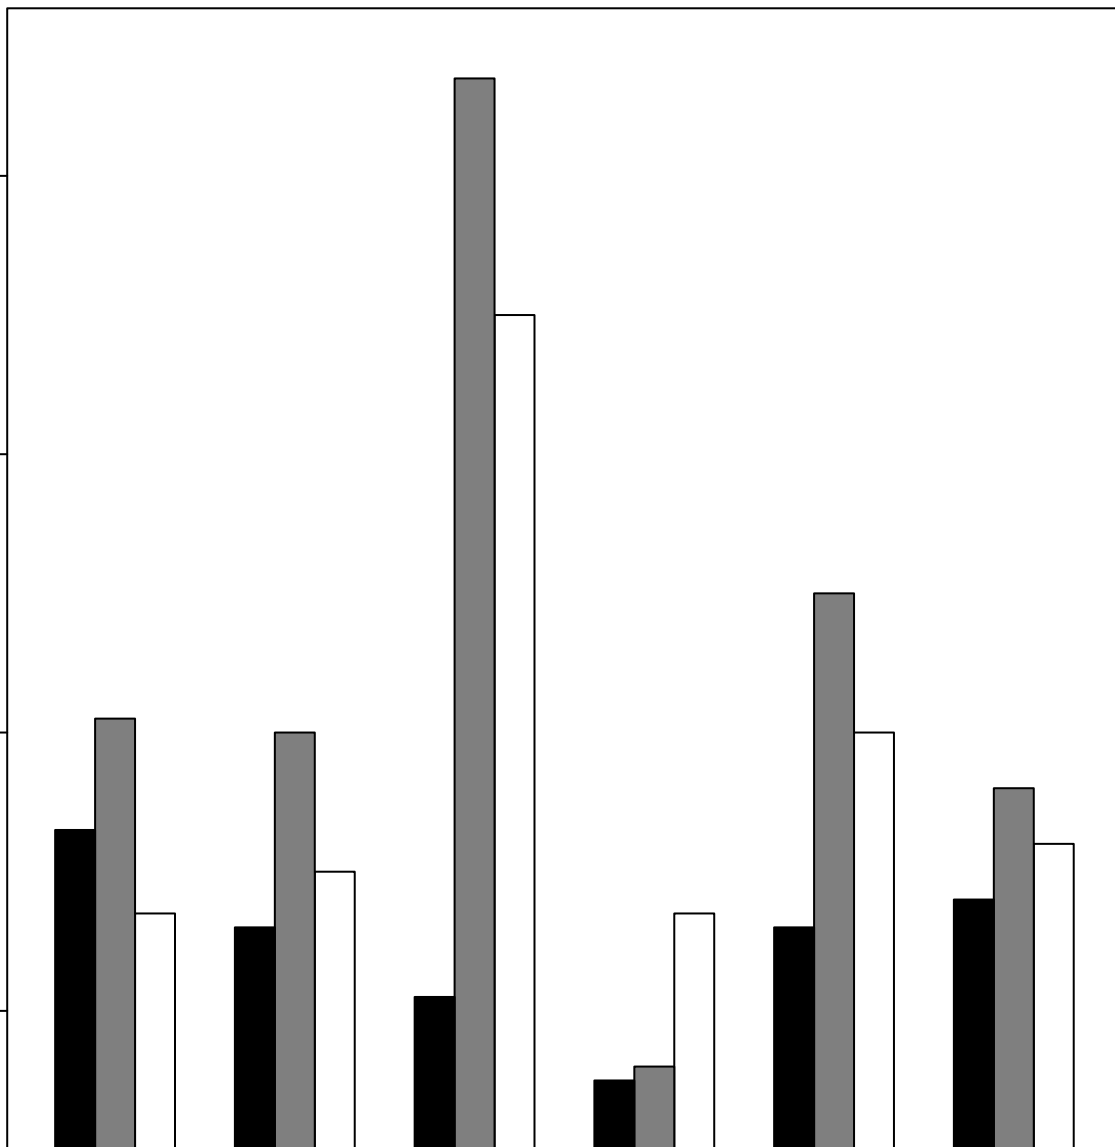

Supplement: 12870_2016_754_MOESM14_ESM.pdf [file 12870_2016_754_MOESM14_ESM.pdf]
