# Supplementary material for: Genetic diversity, linkage disequilibrium and power of a large grapevine (Vitis vinifera L) diversity panel newly designed for association studies
Source: PubMed Central journal article supplement (PMC4802926; doi:10.1186/s12870-016-0754-z), 2016-03-22

# A – Chromosome 08

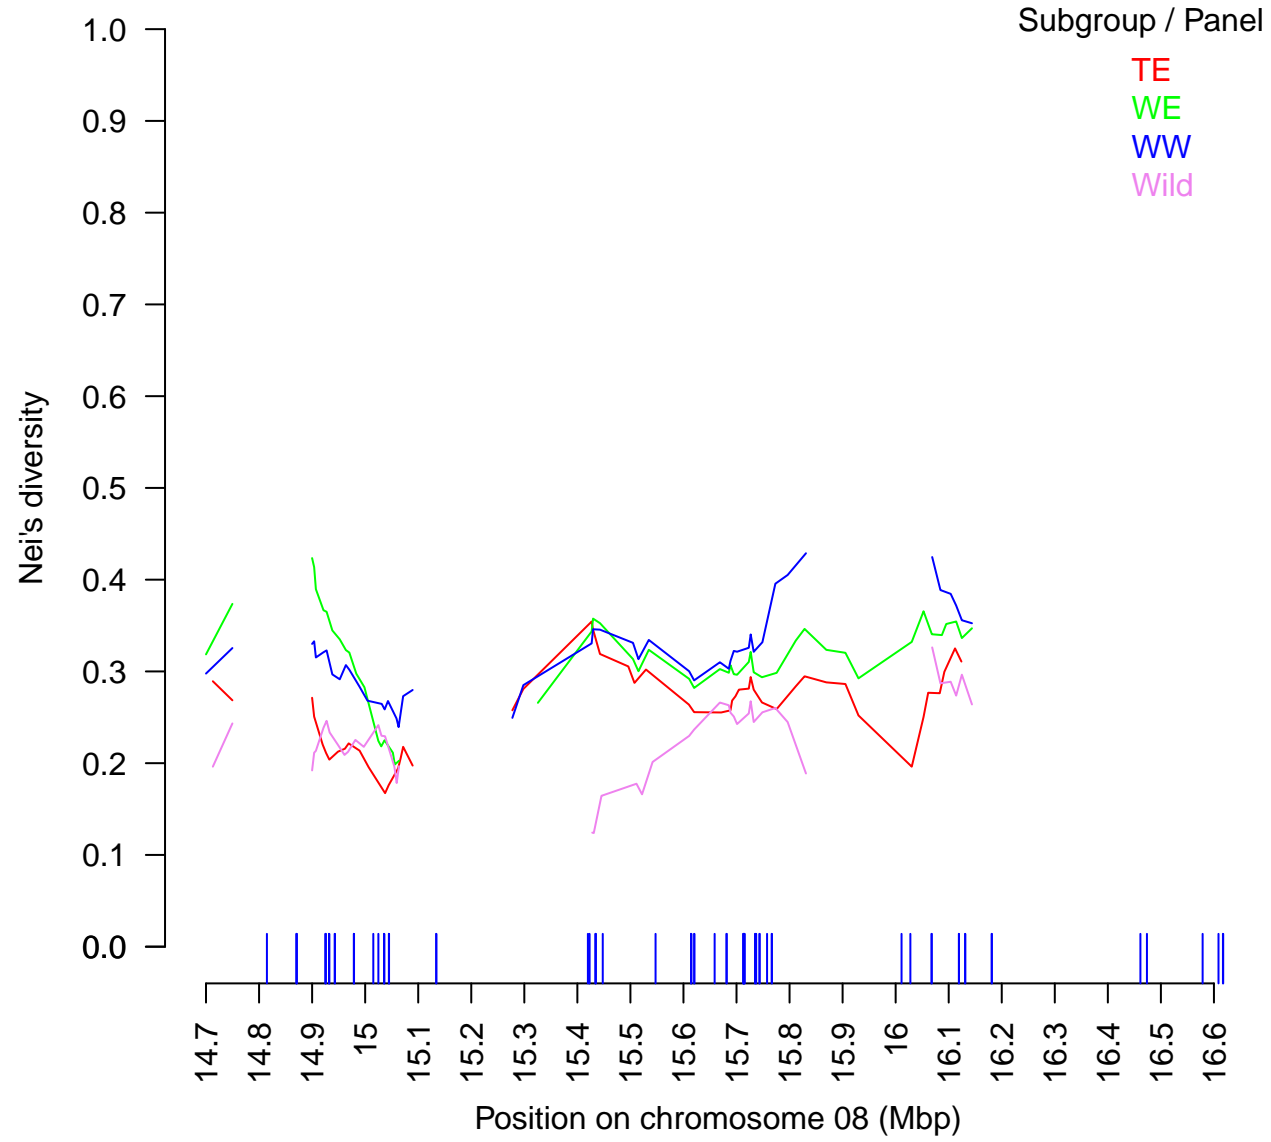

# A – Chromosome 09

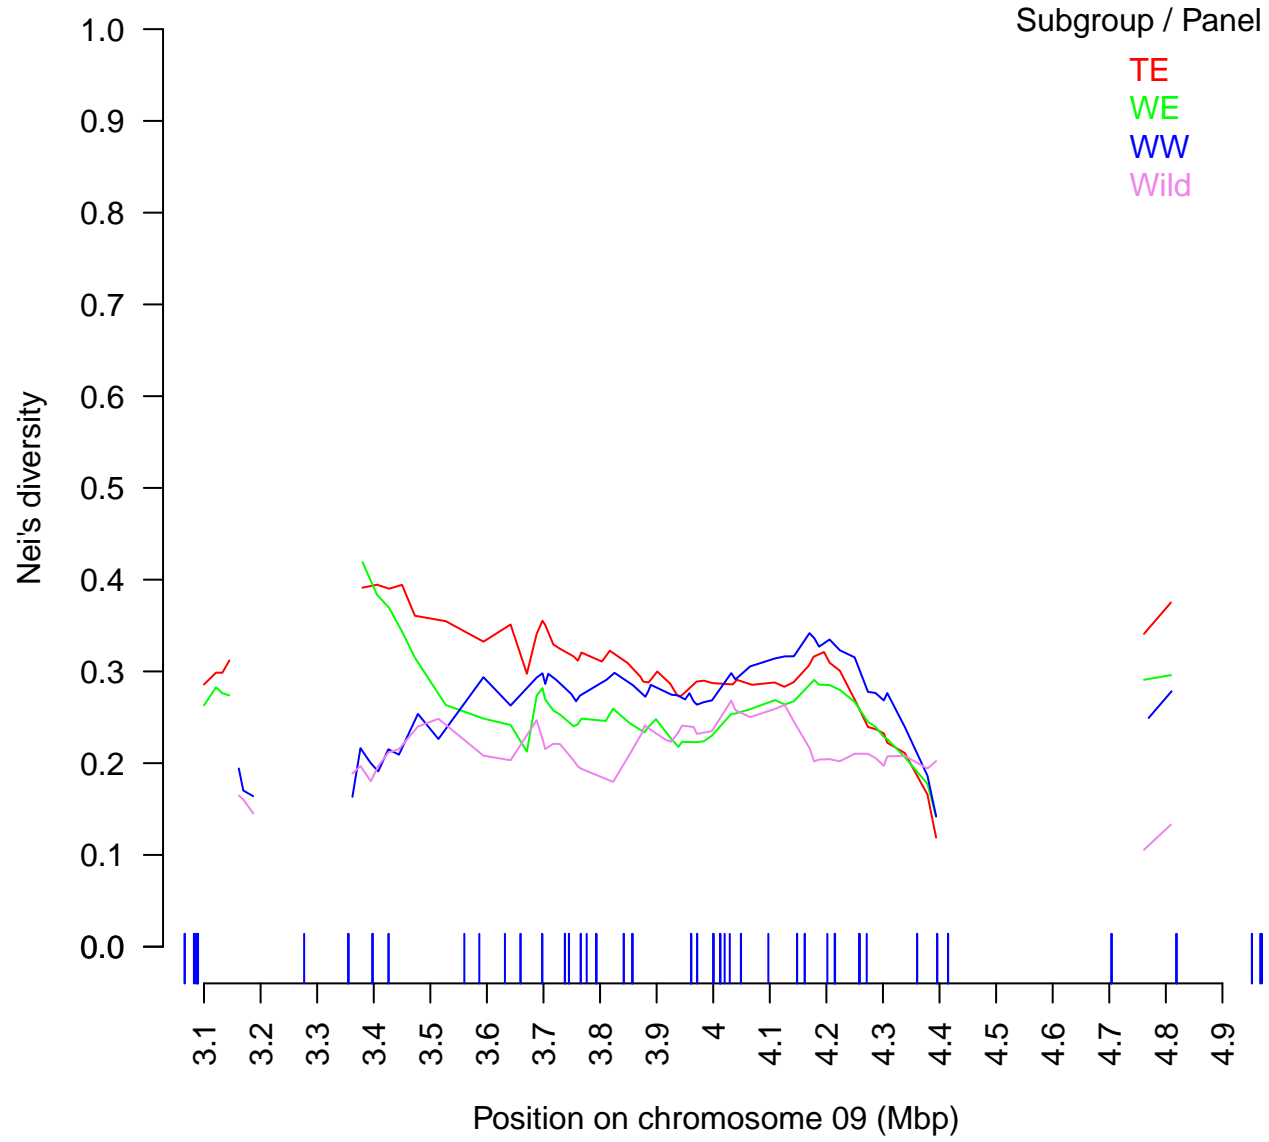

# A – Chromosome 12

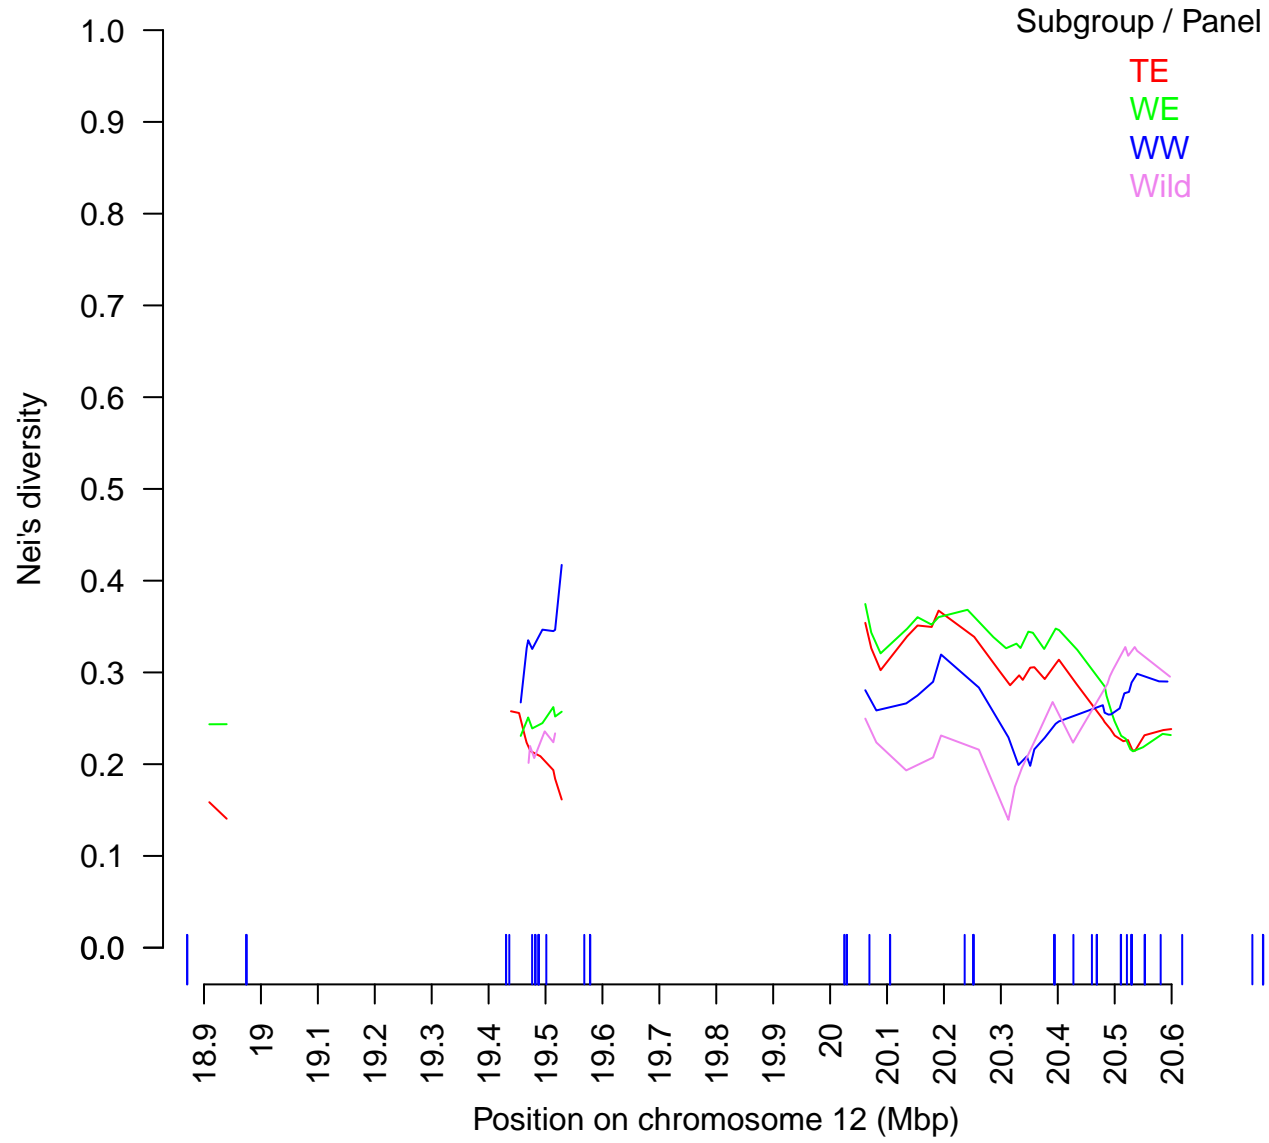

# A – Chromosome 17

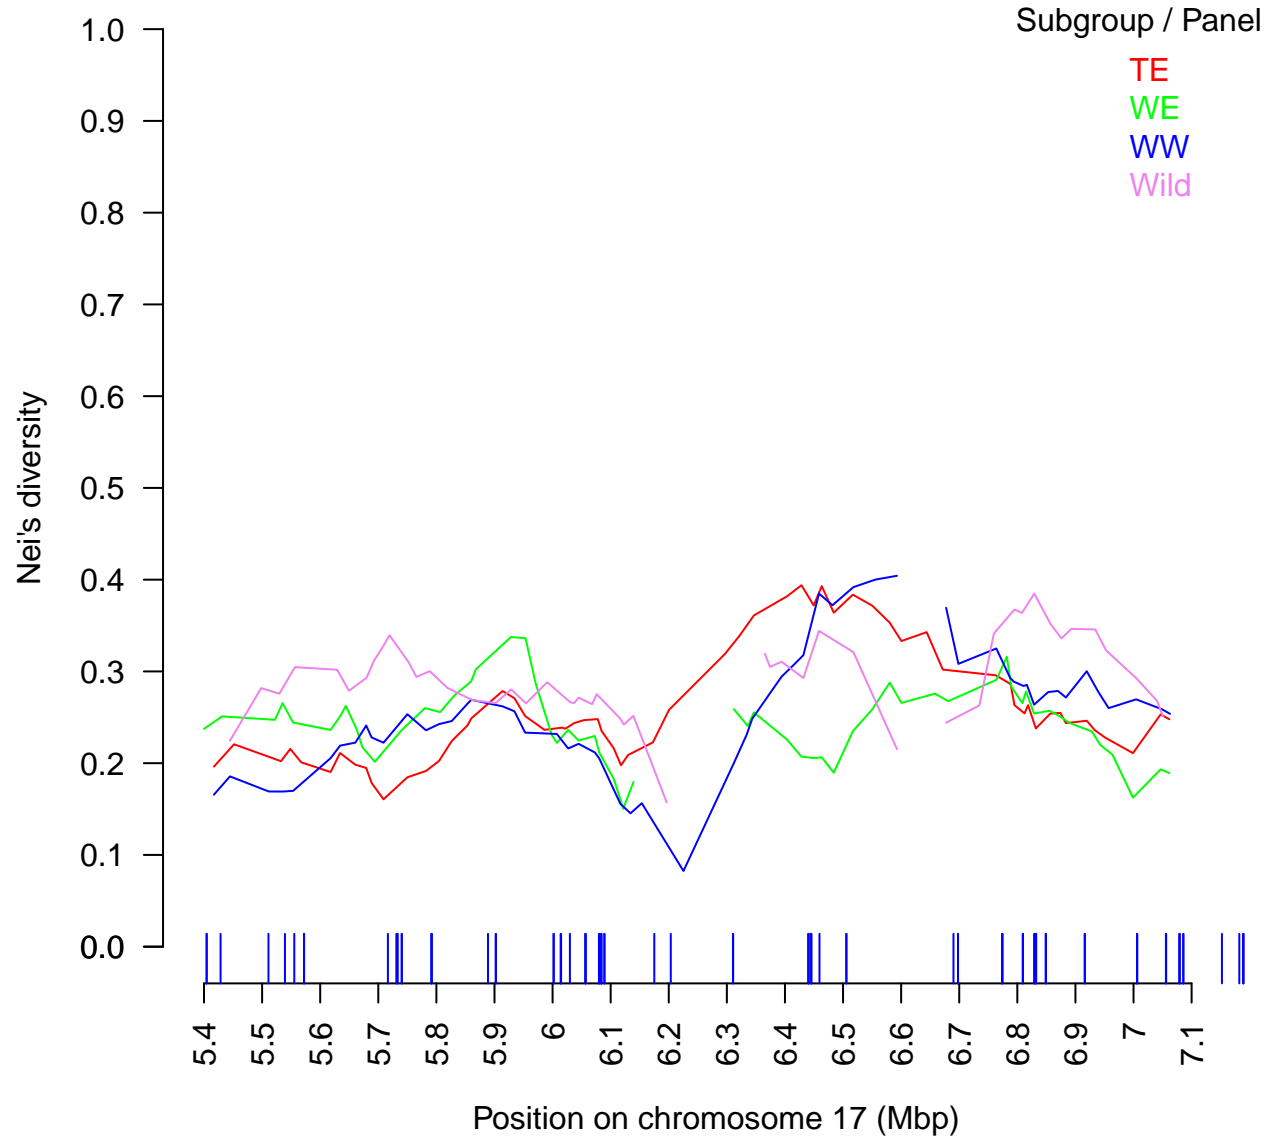

## B – Chromosome 08

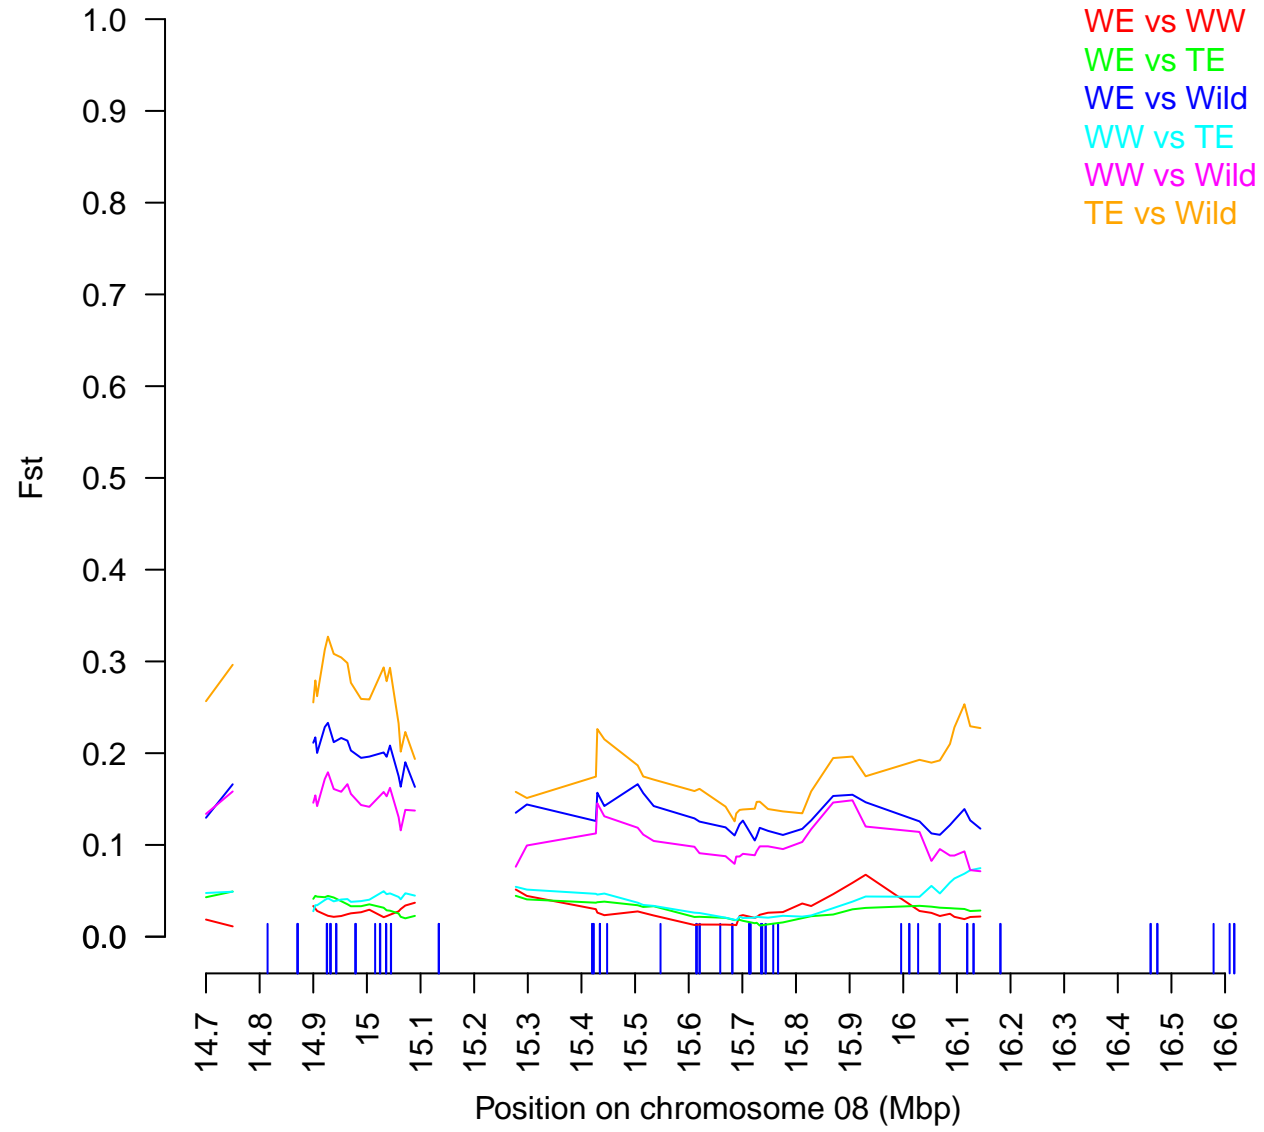

## B – Chromosome 09

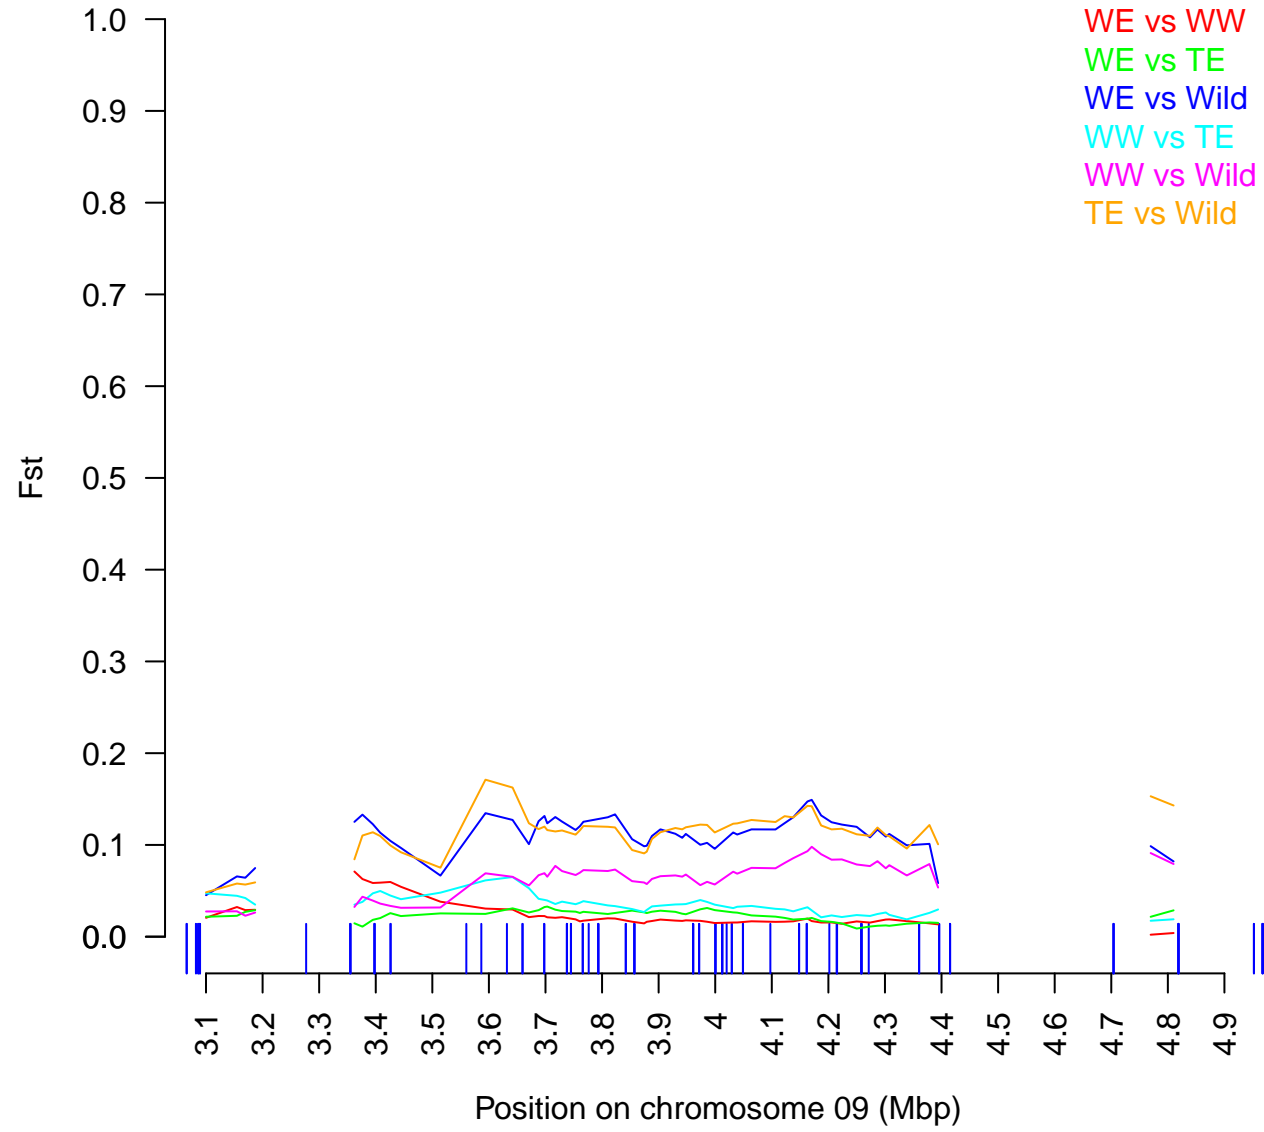

## B – Chromosome 12

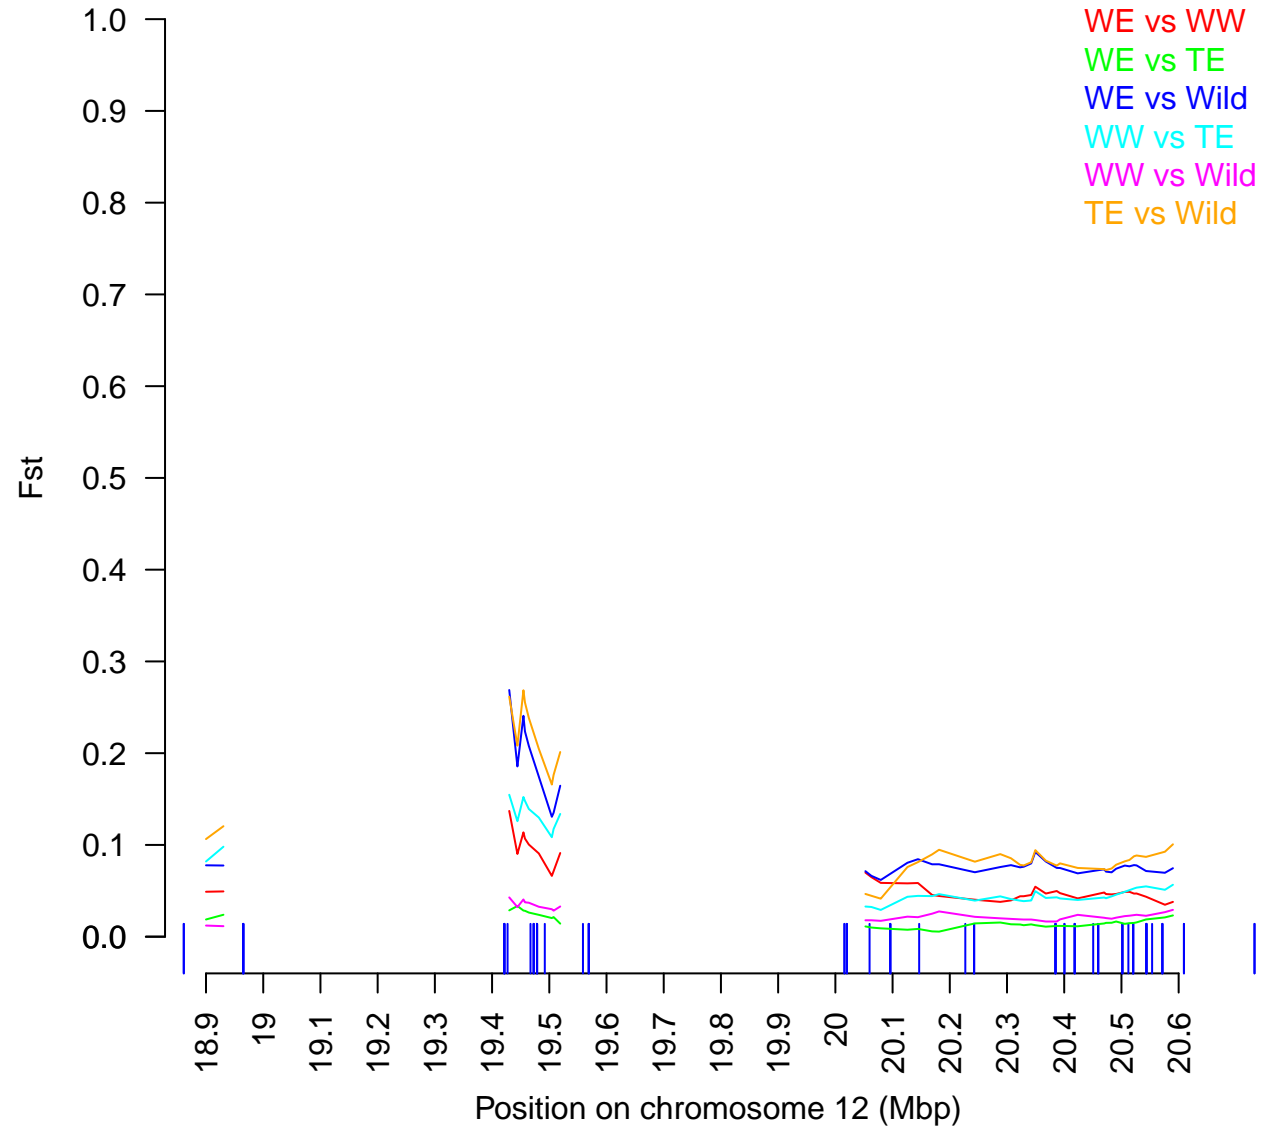

## B – Chromosome 17

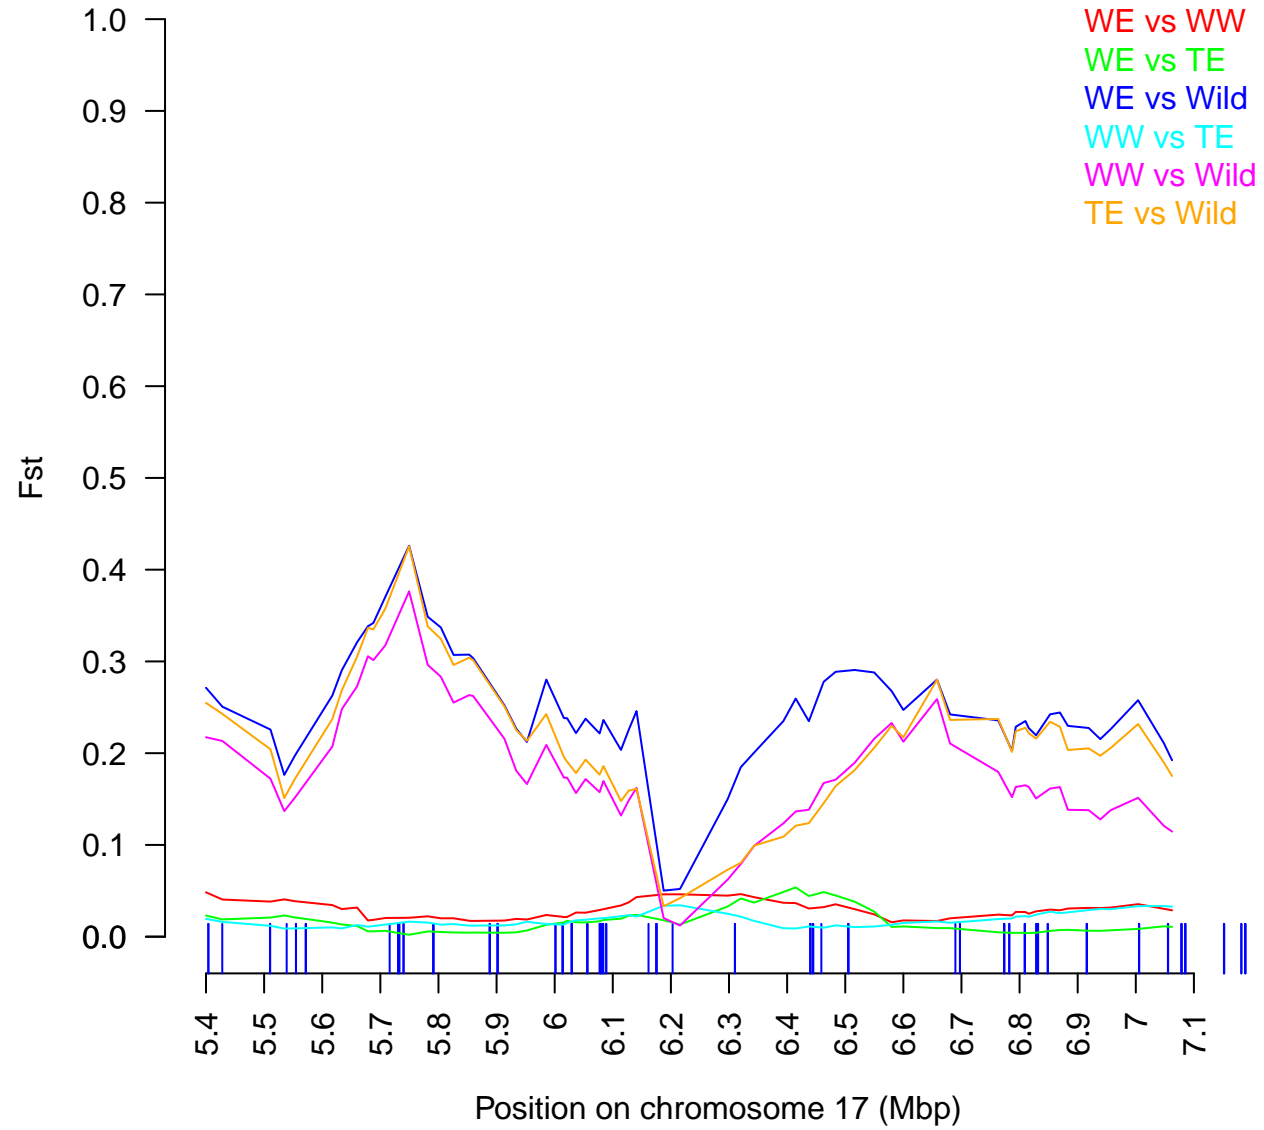

Supplement: 12870_2016_754_MOESM16_ESM.pdf [file 12870_2016_754_MOESM16_ESM.pdf]
